# Supplementary material
Source: PubMed Central journal article supplement (PMC3124602)
Supplement: NIHMS291998-supplement-Supp_Fig_S1-4___Table_S1-2.pdf [file NIHMS291998-supplement-Supp_Fig_S1-4___Table_S1-2.pdf]

## Supporting Information (SI)

### A $\sigma^W$ -dependent stress response in *Bacillus subtilis* that reduces membrane fluidity

Anthony W. Kingston, Chitra Subramanian, Charles O. Rock, and John D. Helmann

**Table S1:** Consensus P<sub>5</sub> nucleotide sequences in *B. subtilis* and related species

| Strain(s)                                                                   | Consensus P <sub>5</sub> nucleotide sequence <sup>a</sup>                            | # of <i>fabH</i> genes | # of $\sigma^{ECF}$ |
|-----------------------------------------------------------------------------|--------------------------------------------------------------------------------------|------------------------|---------------------|
| <i>Bacillus subtilis</i>                                                    | GT <u>TGAAACTTCTGACGAGTGGATT</u> CGTACAAGAACA                                        | 2                      | 7                   |
| Consensus from 6 species closely related to <i>B. subtilis</i> <sup>b</sup> |    | 2                      | 7-10                |
| Consensus from 4 <i>Bacillus ACT</i> species <sup>c</sup>                   |   | 2                      | 7-10                |
| Consensus from 17 <i>Listeria</i> species <sup>d</sup>                      |  | 1                      | 1                   |
| Consensus from 17 <i>Staphylococcus</i> species <sup>d</sup>                |  | 1                      | 1                   |
| Amino acid consensus from all analyzed strains                              |  | NA                     | NA                  |

<sup>a</sup> For each sequence, the region corresponding to the P<sub>5</sub> -35 and -10 elements is underlined.

<sup>b</sup> *Bacillus subtilis* subsp. *subtilis* str. 168, *Bacillus subtilis* subsp. *spizizenii* str. W23, *Bacillus licheniformis* ATCC 14580, *Bacillus atrophaeus* 1942, *Bacillus pumilus* SAFR-032, and *Bacillus amyloliquefaciens* DSM7

<sup>c</sup> *Bacillus anthracis* str. Sterne, *Bacillus thuringiensis* str. Al Hakam, *Bacillus cereus* ATCC 14579, and *Bacillus cereus* subsp. *cytotoxis* NVH 391-98

<sup>d</sup> Includes all 17 *Listeria*/*Staphylococcus* genomes on the U Chicago SEED server (<http://www.theseed.org>)

Note: Residues W38, R42, and T43 are part of the FabH substrate binding site. W38 and T43 (last residue shown) are highly conserved with R42 showing some variability (Gajiwala *et al.*, 2009).

**Table S2:** Bacterial strains, plasmids, and oligos used in this study.

| Strain, plasmid, or oligo         | Genotype or description                                                                         | Source, reference, or construction <sup>1</sup>                                      |
|-----------------------------------|-------------------------------------------------------------------------------------------------|--------------------------------------------------------------------------------------|
| <b><i>B. subtilis</i> strains</b> |                                                                                                 |                                                                                      |
| W168                              | <i>trpC2</i>                                                                                    | Lab Stock                                                                            |
| HB0020                            | <i>CU1065 sigW::MLS</i>                                                                         | (Cao <i>et al.</i> , 2001)                                                           |
| HB6208                            | <i>W168 sigW::spec</i>                                                                          | (Butcher and Helmann, 2006)                                                          |
| HB13001                           | <i>W168 amyE::P<sub>fabHaF</sub>-P<sub>5</sub>-lacZ</i>                                         | pTK001 --> W168                                                                      |
| HB13042                           | <i>W168 amyE::P<sub>xyl</sub>-sigW</i>                                                          | pVG003 --> W168                                                                      |
| HB13054                           | <i>W168 thrC::P<sub>fabHaF</sub>-fabHa-FLAG</i>                                                 | pTK013 --> W168                                                                      |
| HB13056                           | <i>W168 thrC::P<sub>fabHaF</sub>-fabHa-fabF-FLAG</i>                                            | pTK015 --> W168                                                                      |
| HB13058                           | <i>W168 thrC::P<sub>fabHaF</sub>-fabHa-FLAG amyE::P<sub>xyl</sub>-sigW</i>                      | HB13042 chrDNA --> HB13054                                                           |
| HB13060                           | <i>W168 thrC::P<sub>fabHaF</sub>-fabHa-fabF-FLAG amyE::P<sub>xyl</sub>-sigW</i>                 | HB13042 chrDNA --> HB13056                                                           |
| HB13069                           | <i>W168 amyE::P<sub>5</sub>-lacZ</i>                                                            | pTK022 --> W168                                                                      |
| HB13077                           | <i>W168 thrC::P<sub>fabHaF</sub>-fabHa-FLAG sigW::kan</i>                                       | HB0020 chrDNA --> HB13054                                                            |
| HB13078                           | <i>W168 thrC::P<sub>fabHaF</sub>-fabHa-fabF-FLAG sigW::kan</i>                                  | HB0020 chrDNA --> HB13056                                                            |
| HB13080                           | <i>W168 amyE::P<sub>5</sub>*-lacZ</i>                                                           | pTK031 --> W168                                                                      |
| HB13082                           | <i>W168 P<sub>fabHaF</sub>-P<sub>5</sub>*-lacZ</i>                                              | pTK033 --> W168                                                                      |
| HB13099                           | <i>W168 amyE::P<sub>5</sub>-lacZ sigW::MLS</i>                                                  | HB0020 chrDNA --> HB13069                                                            |
| HB13115                           | <i>W168 fabHb::kan</i>                                                                          | LFH-PCR -->168                                                                       |
| HB13117                           | <i>W168 P<sub>fabHaF</sub>-fabHa(P<sub>5</sub>)fabF</i>                                         | pTK043 --> W168                                                                      |
| HB13118                           | <i>W168 P<sub>fabHaF</sub>-fabHa(P<sub>5</sub>*)fabF</i>                                        | pTK044 --> W168                                                                      |
| HB13121                           | <i>W168 P<sub>fabHaF</sub>-fabHa(P<sub>5</sub>)fabF amyE::P<sub>xyl</sub>-sigW</i>              | HB13042 chrDNA --> HB13117                                                           |
| HB13122                           | <i>W168 P<sub>fabHaF</sub>-fabHa(P<sub>5</sub>*)fabF amyE::P<sub>xyl</sub>-sigW</i>             | HB13042 chrDNA --> HB13118                                                           |
| HB13123                           | <i>W168 thrC::P<sub>fabHaF</sub>-fabHa(P<sub>5</sub>*)-FLAG</i>                                 | pTK045 --> W168                                                                      |
| HB13124                           | <i>W168 thrC::P<sub>fabHaF</sub>-fabHa(P<sub>5</sub>*)-fabF-FLAG</i>                            | pTK046 --> W168                                                                      |
| HB13125                           | <i>W168 thrC::P<sub>fabHaF</sub>-fabHa(P<sub>5</sub>*)-FLAG amyE::P<sub>xyl</sub>-sigW</i>      | HB13042 chrDNA --> HB13123                                                           |
| HB13126                           | <i>W168 thrC::P<sub>fabHaF</sub>-fabHa(P<sub>5</sub>*)-fabF-FLAG amyE::P<sub>xyl</sub>-sigW</i> | HB13042 chrDNA --> HB13124                                                           |
| HB13127                           | <i>W168 fabHa::MLS</i>                                                                          | LFH-PCR -->168                                                                       |
| HB13128                           | <i>W168 amyE::P<sub>xyl</sub>-fabF</i>                                                          | pTK047 --> W168                                                                      |
| HB13132                           | <i>W168 fabHa::MLS amyE::P<sub>xyl</sub>-fabF</i>                                               | HB13128 chrDNA --> HB13127                                                           |
| BSU2006                           | <i>W168 ΔsigM ΔsigY ΔsigZ ΔsigV ΔylaC ΔsigX</i>                                                 | (Asai <i>et al.</i> , 2008)                                                          |
| HB13151                           | <i>W168 ΔsigM ΔsigY ΔsigZ ΔsigV ΔylaC ΔsigX P<sub>5</sub>-lacZ</i>                              | HB13069 chrDNA --> BSU2006                                                           |
| <b>Plasmids</b>                   |                                                                                                 |                                                                                      |
| pdg1661                           | Vector for integration of <i>lacZ</i> fusions at <i>amyE</i>                                    | (Guerout-Fleury <i>et al.</i> , 1996)                                                |
| pdg1664                           | Vector for integration at <i>thrC</i> locus                                                     | (Guerout-Fleury <i>et al.</i> , 1996)                                                |
| pMUTIN                            | Vector for allelic replacement                                                                  | (Vagner <i>et al.</i> , 1998)<br>Veronica Guariglia-Oropeza<br>(unpublished results) |
| pVG003                            | <i>pSWEET-sigW (cat)</i>                                                                        |                                                                                      |
| pTK001                            | <i>pDG1661-P<sub>fabHaF</sub>-P<sub>5</sub>-lacZ (cat)</i>                                      | This work                                                                            |
| pTK013                            | <i>pDG1664-P<sub>fabHaF</sub>-fabHa-FLAG (MLS)</i>                                              | This work                                                                            |
| pTK015                            | <i>pDG1664-P<sub>fabHaF</sub>-fabHa-fabF-FLAG (MLS)</i>                                         | This work                                                                            |
| pTK022                            | <i>pDG1661-P<sub>5</sub>-lacZ (cat)</i>                                                         | This work                                                                            |
| pTK031                            | <i>pDG1661-P<sub>5</sub>*-lacZ (cat)</i>                                                        | This work                                                                            |
| pTK033                            | <i>pDG1661-P<sub>fabHaF</sub>-P<sub>5</sub>*-lacZ (cat)</i>                                     | This work                                                                            |
| pTK043                            | <i>pMUTIN- P<sub>fabHaF</sub>-P<sub>5</sub> (MLS)</i>                                           | This work                                                                            |

|        |                                                                         |           |
|--------|-------------------------------------------------------------------------|-----------|
| pTK044 | <i>pMUTIN- P<sub>fabHaF</sub>-P<sub>5</sub>* (MLS)</i>                  | This work |
| pTK045 | <i>pDG1664-P<sub>fabHaF</sub>-fabHa(P<sub>5</sub>*)-FLAG (MLS)</i>      | This work |
| pTK046 | <i>pDG1664-P<sub>fabHaF</sub>-fabHa(P<sub>5</sub>*)-fabF-FLAG (MLS)</i> | This work |
| pTK047 | <i>pSWEET-fabF (cat)</i>                                                | This work |

| Oligos | Name                                         | Sequence                                                                             |
|--------|----------------------------------------------|--------------------------------------------------------------------------------------|
| 4520   | P <sub>5</sub> GSP1                          | CGTACATGAAGCCCGCAC                                                                   |
| 4521   | P <sub>5</sub> GSP2                          | CCGAGTTGTTCTTGAATCATA                                                                |
| 4549   | AAP                                          | GGCCACGCGTCGACTAGTACGGGIIGGGIIGGGIIG                                                 |
| 4778   | FabHa UP BamHI                               | AGCTGGATCCCCAACTGCATACGCCTCCTT<br>AGCTGAATTCCTTATTATTTATCATCATCATCTTTATAATCCGGCCGAAC |
| 4780   | FabHa Flag DO EcoRI                          | GACCACATCGCCGTCT<br>AGCTGAATTCCTTATTATTTATCATCATCATCTTTATAATCCGGCCGGAA               |
| 4781   | FabF Flag DO EcoRI                           | TCCTAATGAGTTGCTGA                                                                    |
| 4883   | P <sub>5</sub> Fwd cgGa -10 element          | TCTGACGAGTGGATTTCGGACAAGAACAGGAATAGAAG                                               |
| 4884   | P <sub>5</sub> Rev cgGa -10 element          | TCTATTCCTGTTCTTGTCCGAATCCACTCGTCAGAAG                                                |
| 4576   | P <sub>fabHaF</sub> -P <sub>5</sub> UP EcoRI | AGTCGAATCCAACTGCATACGCCTCCT                                                          |
| 4577   | P <sub>5</sub> DO BamHI                      | AGTCGGATCCCGTACATGAAGCCCGCAC                                                         |
| 4852   | P <sub>5</sub> UP EcoRI                      | AGTCGAATTCAGGATAGAATTAGTACCTGATA                                                     |
| 5059   | fabHb up-fwd                                 | CGTACAAAACAAGCAGAGACA                                                                |
| 5060   | fabHb up-rev (kan)                           | CCTATCACCTCAAATGGTTCGCTGTCACCTCCTTATGGTCAGATTA                                       |
| 5061   | fabHb do-fwd (kan)                           | CGAGCGCCTACGAGGAATTTGTATCGGATTAACCTATACAGGATTGCT                                     |
| 5062   | fabHb do-rev                                 | GACAGGAAGCAGCCAAGTAT                                                                 |
| 5164   | P <sub>fabHaF</sub> -up-rev (MLS)            | GAGGGTTGCCAGAGTTAAAGGATCGATGTGTTTTCAAGAATGATGT                                       |
| 5165   | P <sub>fabHaF</sub> -do-fwd (MLS)            | CGATTATGTCTTTTGCGCAGTCGGCCAACTGCATACGCCTCCTT                                         |
| 5166   | P <sub>fabHaF</sub> -do-rev                  | TTAGTCATTAGGGAAGACTCCTTTATATCT                                                       |
| 5167   | fabF-do-fwd                                  | AGATATAAAGGAGTCTTCCCTAATGACTAAAAAAGAGTAGTTGT                                         |
| 5168   | fabF UP RBS PacI                             | AGTCTTAATTAAGGAGGACACAAGATGACTAAAAAAGA                                               |
| 5169   | fabF DO BamHI                                | AGTCGGATCCTCATGTGATCGCCTCCTCT                                                        |

| Other Bacillus Strains                          | Bacillus Genetic Stock Center (BGSC) # |
|-------------------------------------------------|----------------------------------------|
| <i>B. subtilis ssp. spizizenii</i> NRRL B-23049 | 2A8 <sup>T</sup>                       |
| <i>B. subtilis ssp. spizizenii</i> NRRL B-14472 | 2A9                                    |
| <i>B. licheniformis</i> ATCC14580               | 5A36T                                  |
| <i>B. amyloliquefaciens</i> FZB42               | NA                                     |
| <i>B. atrophaeus</i> NRS-213                    | 11A2T                                  |
| <i>B. atrophaeus</i> ESM <i>rplV</i> str        | 12A1                                   |

<sup>1</sup> Abbreviations used: --> indicates transformation; chrDNA indicates chromosomal DNA.

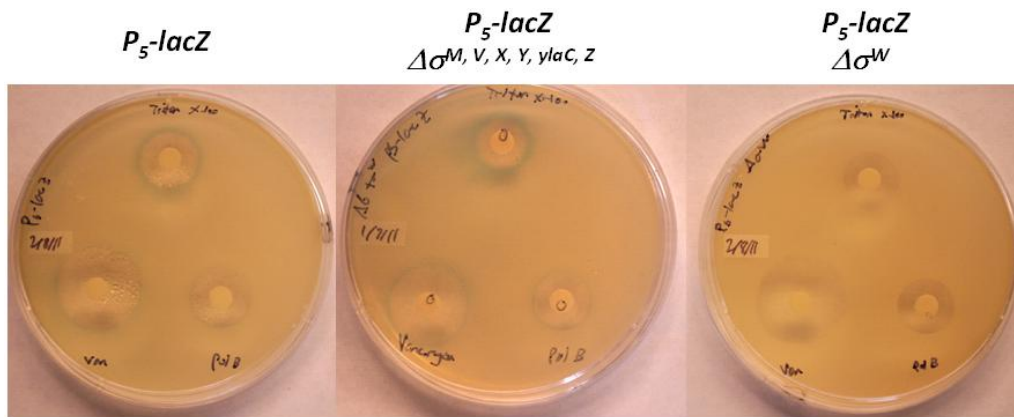

**Figure S1:** Disk diffusion assays to monitor induction of  $P_5-lacZ$  by cell envelope antibiotics. Representative results are shown for HB13069 ( $P_5-lacZ$ ), HB13151 ( $P_5-lacZ \Delta sigM \Delta sigY \Delta sigZ \Delta sigV \Delta ylaC \Delta sigX$ ), and HB13099 ( $P_5-lacZ sigW::MLS$ ) under triton X-100 (top disk), vancomycin (bottom left disk), and polymyxin B (bottom right disk) treatments. Pictures are representative of at least three independent experiments performed with biological triplicates.

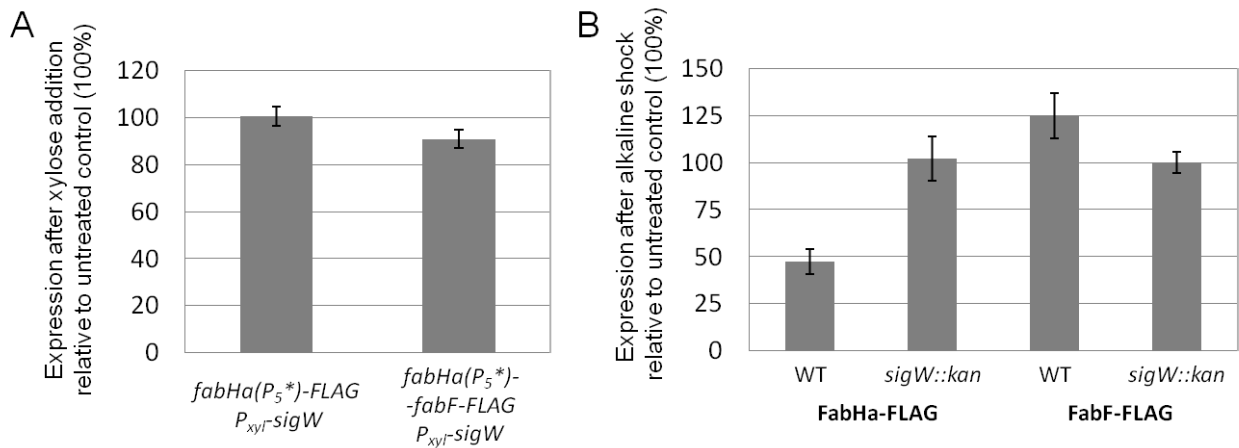

**Figure S2:** Supplementary Western blot quantification.

A. Change in expression of FabHa-FLAG in *fabHa(P<sub>5</sub>\*)-FLAG P<sub>xyl</sub>-sigW* (HB13125) and of FabF-FLAG in *fabHa(P<sub>5</sub>\*)-fabF-FLAG P<sub>xyl</sub>-sigW* (HB13126) upon xylose treatment. This experiment was performed in biological triplicate and repeated at least three times. Bars represent the relative levels of FabHa-FLAG or FabF-FLAG compared to an untreated control (error bars indicate standard error). Student's *t* tests showed no statistically significant difference ( $P$  value  $\geq 0.05$ ) between the xylose and non-xylose treated cells for both FabHa-FLAG and FabF-FLAG expression.

B. Change in expression of FabHa-FLAG and FabF-FLAG levels following alkaline shock in strains *fabHa-FLAG* (HB13054), *fabF-FLAG* (HB13056), *fabHa-FLAG sigW::kan* (HB13077), and *fabF-FLAG sigW::kan* (HB13078). Bars represent the relative levels of FabHa-FLAG or FabF-FLAG compared to an untreated control with error bars indicating standard error. Student's *t* tests showed a statistically significant difference ( $P$  value  $\leq 0.05$ ) between the *fabHa-FLAG* and *fabHa-FLAG sigW::kan* strains, but a non-significant difference ( $P$  value  $\geq 0.05$ ) between the *fabF-FLAG* and *fabF-FLAG sigW::kan* strains.

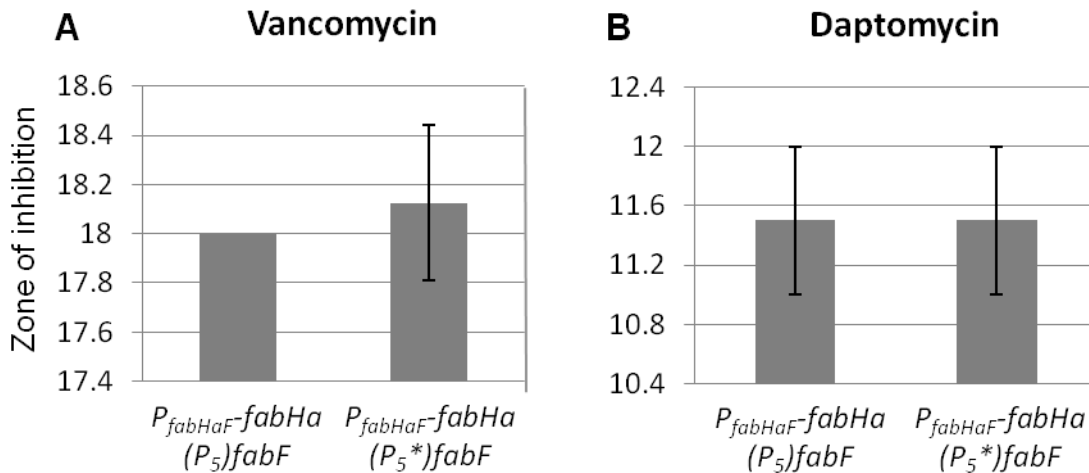

**Figure S3:** Disk diffusion assays of vancomycin (A) and daptomycin (B) sensitivity in the  $P_{fabHaF-fabHa}(P_5)fabF$  (HB13117), and  $P_{fabHaF-fabHa}(P_5^*)fabF$  (HB13118) strains. Each bar represents the average zone of inhibition of at least three assays performed with three independent clones of each strain. Error bars represent standard error. Student's  $t$  tests were performed, and the zones of inhibition for the two strains were not significantly different ( $P$  value  $\geq 0.05$ ) under vancomycin or daptomycin treatment.

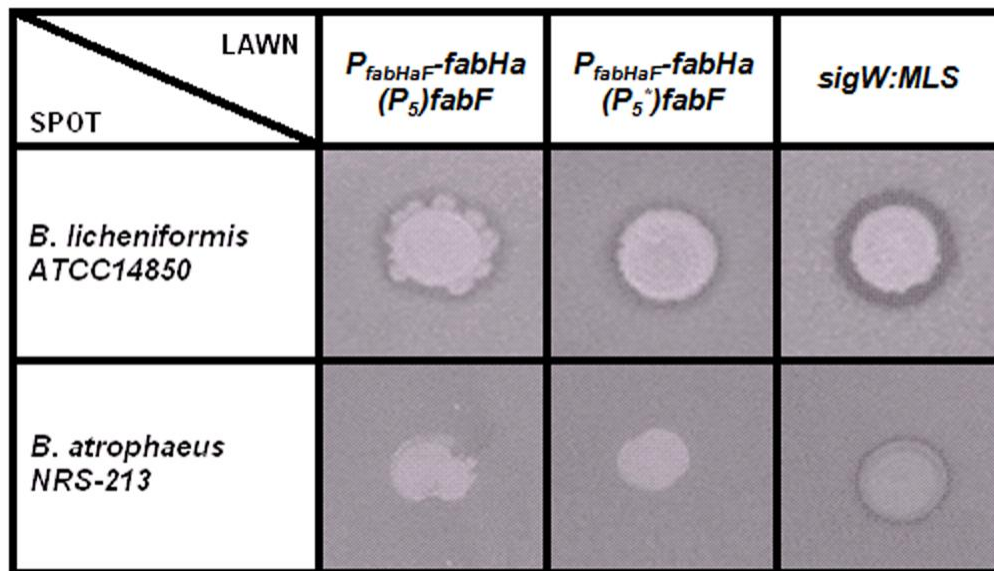

**Figure S4:** Spot on lawn assays showing the sensitivity of the  $P_{fabHaF-fabHa}(P_5)fabF$  (HB13117),  $P_{fabHaF-fabHa}(P_5^*)fabF$  (HB13118), and  $sigW::spec$  (HB6208) lawns to *B. licheniformis* ATCC14850 and *B. atrophaeus* NRS-213. Pictures are representative of at least three assays performed with three independent clones of each strain.

## References

- Asai, K., Ishiwata, K., Matsuzaki, K., and Sadaie, Y. (2008) A viable *Bacillus subtilis* strain without functional extracytoplasmic function sigma genes. *J Bacteriol* **190**: 2633-2636.
- Butcher, B.G., and Helmann, J.D. (2006) Identification of *Bacillus subtilis*  $\sigma^W$ -dependent genes that provide intrinsic resistance to antimicrobial compounds produced by Bacilli. *Mol Microbiol* **60**: 765-782.
- Cao, M., Bernat, B.A., Wang, Z., Armstrong, R.N., and Helmann, J.D. (2001) FosB, a cysteine-dependent fosfomycin resistance protein under the control of  $\sigma^W$ , an extracytoplasmic-function  $\sigma$  factor in *Bacillus subtilis*. *J Bacteriol* **183**: 2380-2383.
- Gajiwala, K.S., Margosiak, S., Lu, J., Cortez, J., Su, Y., Nie, Z., and Appelt, K. (2009) Crystal structures of bacterial FabH suggest a molecular basis for the substrate specificity of the enzyme. *FEBS Lett* **583**: 2939-2946.
- Guerout-Fleury, A.-M., Frandsen, N., and Stragier, P. (1996) Plasmids for ectopic integration in *Bacillus subtilis*. *Gene* **180**: 57-61.
- Vagner, V., Dervyn, E., and Ehrlich, S.D. (1998) A vector for systematic gene inactivation in *Bacillus subtilis*. *Microbiology* **144**: 3097-3104.
